# Supplementary material for: Carbon nanofiber-supported B2O3–SnOx glasses as anode materials for high-performance lithium-ion batteries
Source: Royal Society of Chemistry journal article supplement (doi:10.1039/c5ra19387g), 2015-01-01
Supplement: c5ra19387g1.pdf [file c5ra19387g1.pdf]

## Supplementary Information

### **Carbon nanofibers-supported B<sub>2</sub>O<sub>3</sub>–SnO<sub>x</sub> glasses as anode materials for high-performance lithium-ion batteries**

Qian Li<sup>‡a</sup>, Jin-Le Lan<sup>‡a,b</sup>, Yuan Liu<sup>a</sup>, Yunhua Yu<sup>a,b\*</sup>, Xiaoping Yang<sup>a</sup>

---

<sup>a</sup> *State Key Laboratory of Organic-Inorganic Composites, Beijing University of Chemical Technology, Beijing 100029, China*

<sup>b</sup> *Changzhou Institute of Advanced Materials, Beijing University of Chemical Technology, Beijing 100029, China*

<sup>‡</sup> *These authors contributed equally to this work*

<sup>\*</sup> *Corresponding author. Tel. /Fax: +8610-6442-7698/2084*

*E-mail address: yuyh@mail.buct.edu.cn*

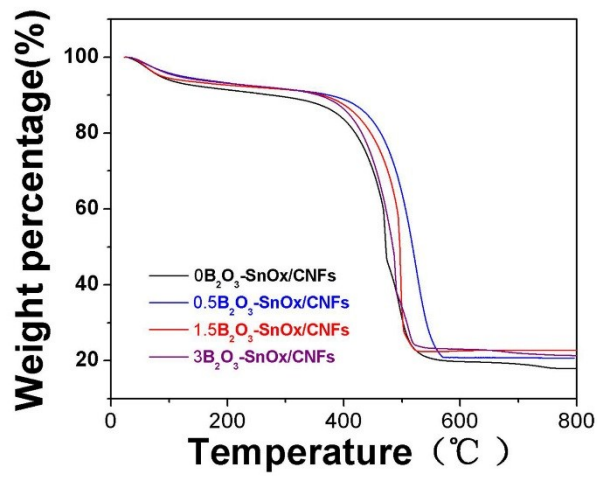

Fig. 1S. Thermogravimetric analysis (TGA) curve of all the samples.

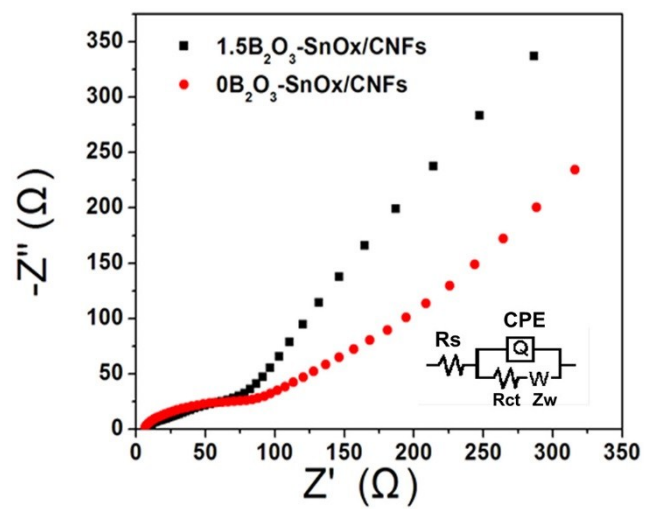

Fig.2S. Electrochemical impedance spectroscopy (EIS) for both  $0B_2O_3-SnO_x/CNFs$  and  $1.5B_2O_3-SnO_x/CNFs$  electrodes after the 50 charge-discharge cycles, inset is modeled equivalent circuit of EIS.
